# Supplementary material for: Piezo1 promoted hepatocellular carcinoma progression and EMT through activating TGF-β signaling by recruiting Rab5c
Source: Springer Nature journal article supplement (doi:10.1186/s12935-022-02574-2), 2022-04-23
Supplement: MOESM2 [file 20338120]

## Supplementary Figures

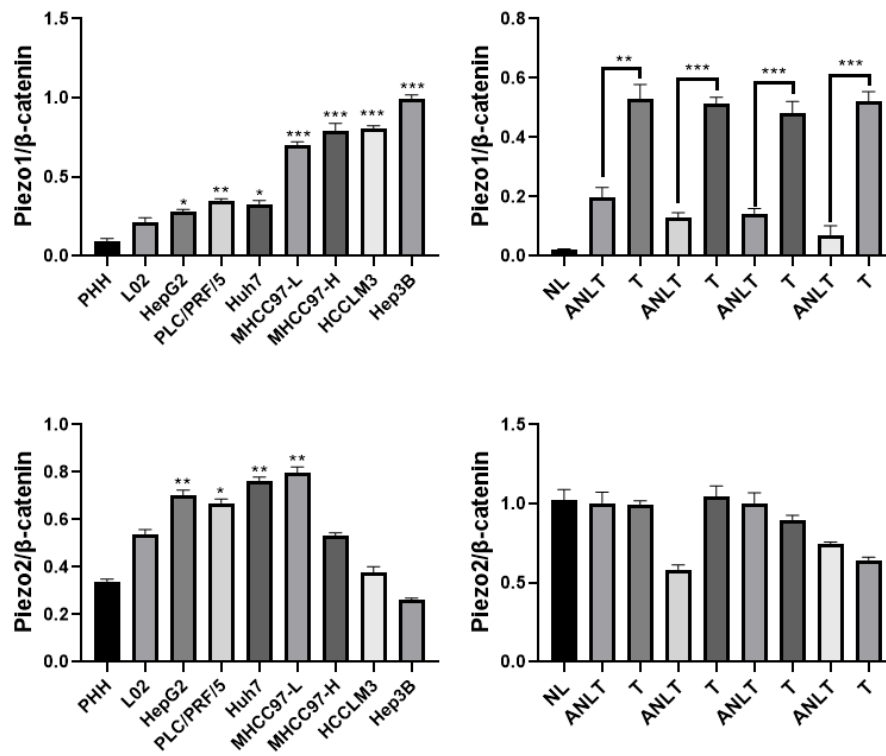

Supplementary Fig. S1 Piezo1 and Piezo2 protein quantification in western blotting shown in Fig1. A (n=3,\*P<0.05, \*\*P<0.01,\*\*\*P<0.001).

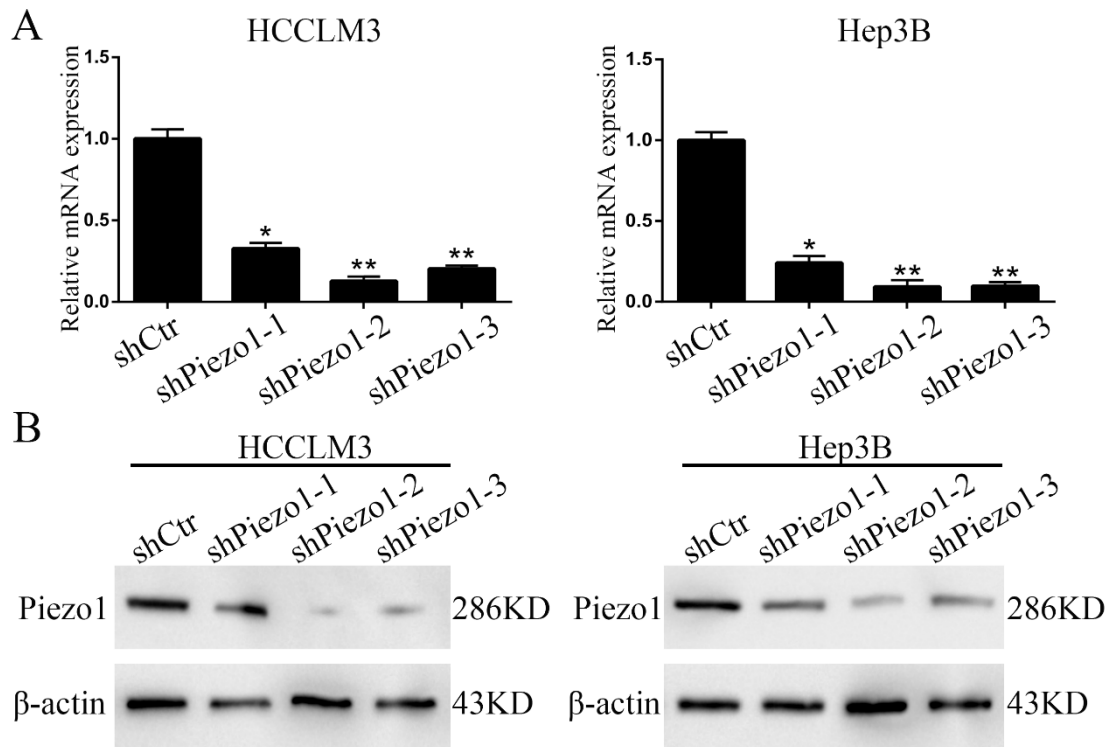

Supplementary Fig. S2 Interfered Piezo1 in HCCLM3 and Hep3B cells. (A-B) After interfered Piezo1 in HCCLM3 and Hep3B cells by three shRNAs separately, the expression level of Piezo1 was identified by real-time PCR(A) and western blotting(B).

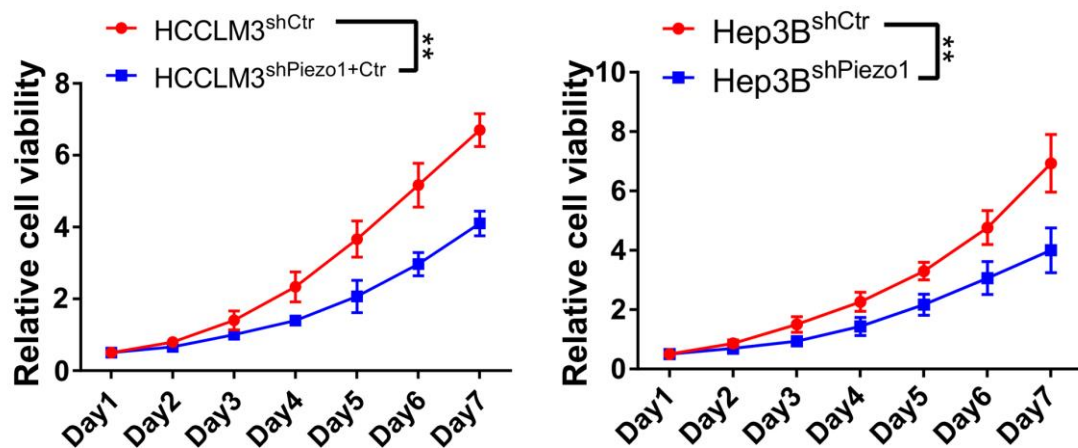

Supplementary Fig. S3 MTT assays was used to detect the proliferation of Hep3B<sup>shPiezo1</sup>, HCCLM3<sup>shPiezo1</sup> and the control HCC cells (n=6 for each

group).

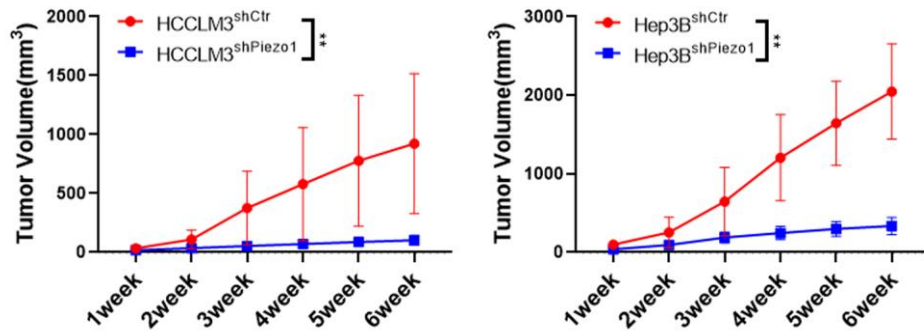

Supplementary Fig. S4 Growth curve of subcutaneous xenograft tumor derived Hep3B<sup>shPiezo1</sup>, HCCLM3<sup>shPiezo1</sup> and the control HCC cells (n=6 each group, \*\*P<0.01).

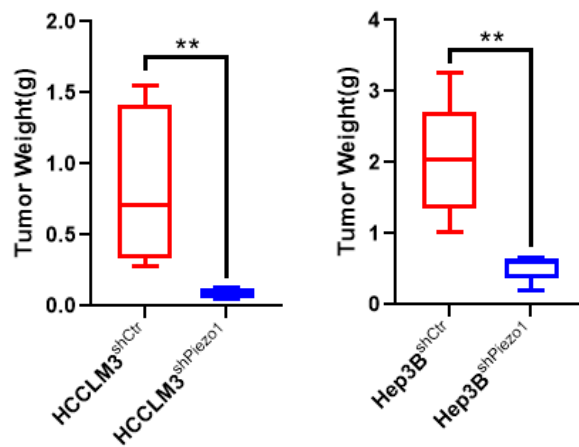

Supplementary Fig. S5 Weight of subcutaneous xenograft tumors derived Hep3B<sup>shPiezo1</sup>, HCCLM3<sup>shPiezo1</sup> and the control HCC cells(n=6 each group, \*\*P<0.01)

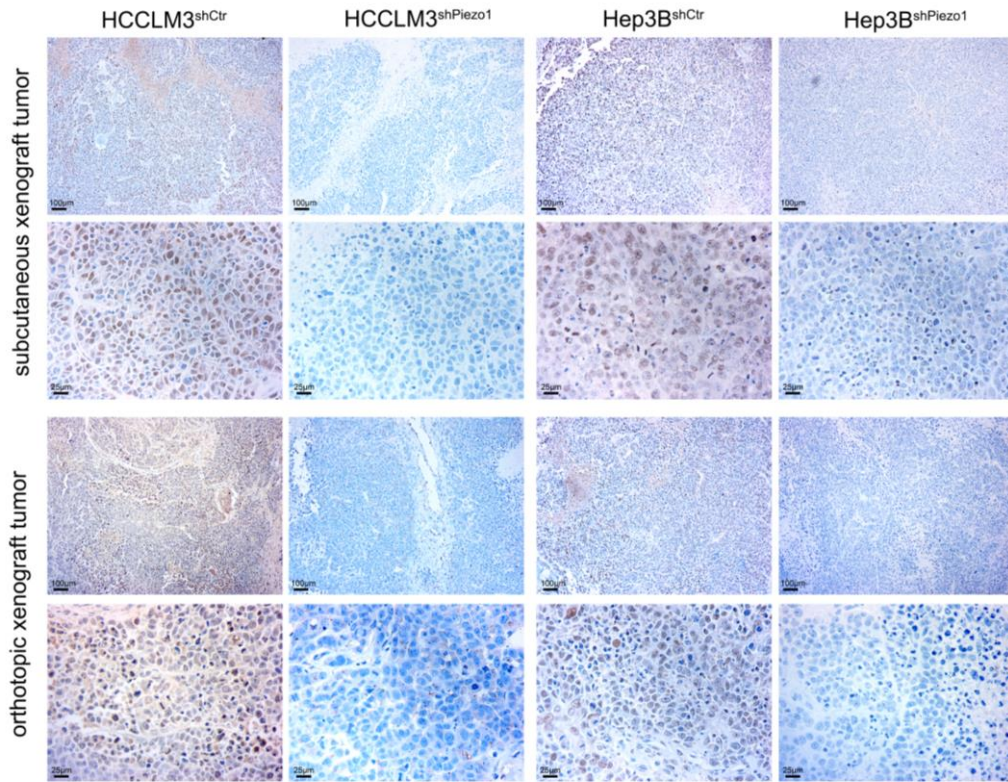

Supplementary Fig. S6 Ki67 for the subcutaneous xenograft tumors and orthotopic xenograft tumors was detected by IHC.

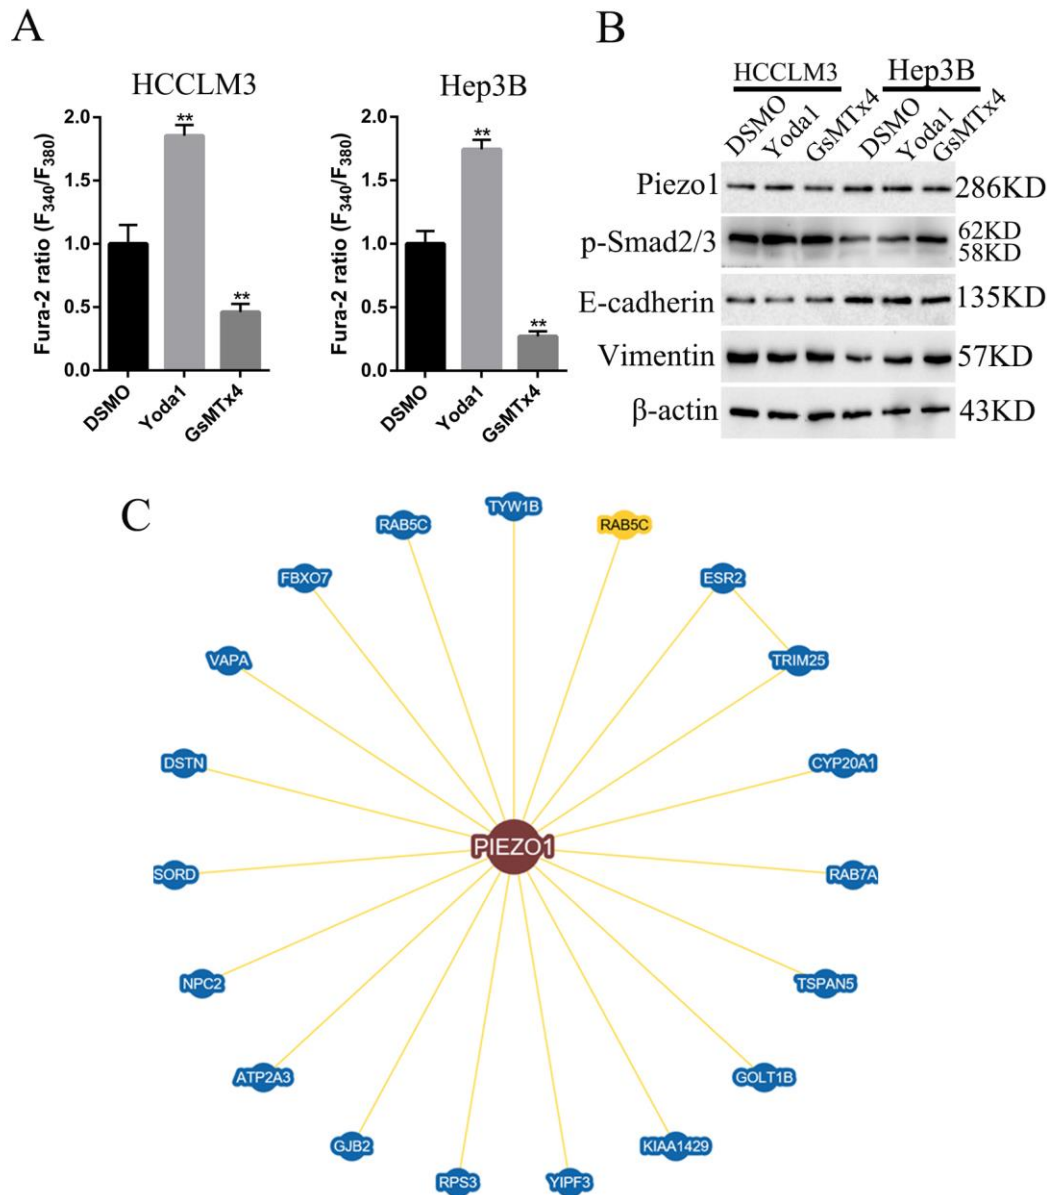

Supplementary Fig. S7  $\text{Ca}^{2+}$  influx was not the dominant factor in Piezo1 activated TGF- $\beta$  signaling. (A) Measurements of  $\text{Ca}^{2+}$  concentration after treated HCCLM3 and Hep3B cells with Yoda1(the activator of Piezo1, 20mM) and GsMTx4 (the inhibitor of Piezo1, 2.5 $\mu\text{M}$ ). (B) Examination of p-Smad2/3 and marker of EMT by Western blot, the  $\text{Ca}^{2+}$  influx was not the dominant factor in Piezo1 activated TGF- $\beta$  signaling and EMT. (C) BioGrid 4.4 database indicates that Piezo1 might interact with Rab5c.
